# Supplementary material
Source: PubMed Central journal article supplement (PMC3896098)
Supplement: NIHMS416316-supplement-1_si_001.pdf [file NIHMS416316-supplement-1_si_001.pdf]

# **Quinone Induced Activation of Keap1/Nrf2 Signaling by Aspirin Prodrugs Masquerades as Nitric Oxide**

TAREISHA DUNLAP, SUJEEWA C. PIYANKARAGE, GIHANI T. WIJEWICKRAMA, SAMER ABDUL-HAY,  
MICHAEL VANNI, VLADISLAV LITOSH, JIA LUO, AND GREGORY R. J. THATCHER\*

Department of Medicinal Chemistry & Pharmacognosy, University of Illinois College of Pharmacy,  
University of Illinois at Chicago, 833 S Wood St, Chicago, IL 60612

\*Correspondence: Gregory Thatcher, Department of Medicinal Chemistry and Pharmacognosy, University of  
Illinois at Chicago, 833 S. Wood Street, Chicago, IL, 60612; E-mail: thatcher@uic.edu

## Supporting Information

Figure S1: Effect of *p*BrASA on intracellular NO concentrations. DAF-DA fluorescence in HepG2 cells after 4 h treatment with DMSO, L-NAME (5  $\mu$ M), *p*Br-ASA (25  $\mu$ M) and L-NAME (5  $\mu$ M) after 30 min with *p*Br-ASA (25  $\mu$ M) after 4 h.

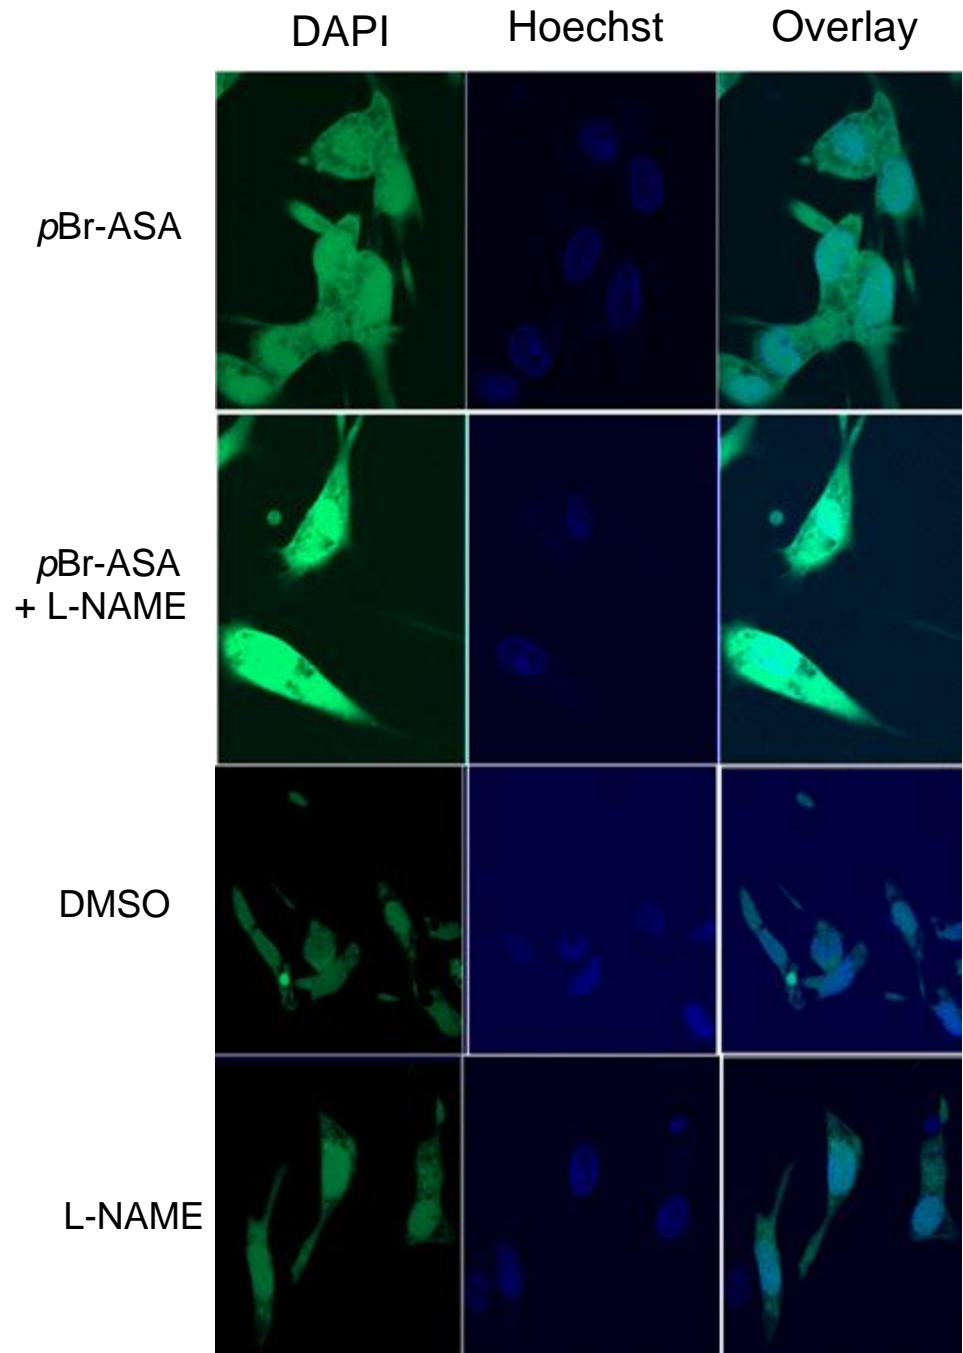

Figure S1: Effect of *p*BrASA on intracellular NO concentrations. DAF-DA fluorescence in HepG2 cells after 4 h treatment with DMSO, L-NAME (5  $\mu$ M), *p*Br-ASA (25  $\mu$ M) and L-NAME (5  $\mu$ M) after 30 min with *p*Br-ASA (25  $\mu$ M) after 4 h.
